# Supplementary material for: Recruitment via social media: advantages and potential biases
Source: PubMed Central journal article supplement — Digit Health. 2019 Aug 6;5:2055207619867223. doi: 10.1177/2055207619867223 (PMC6685119; doi:10.1177/2055207619867223), 2019-08-06
Supplement: Supplemental_Material.pdf [file Supplemental_Material.pdf]

**Supplemental Table 1. Social Media Recruitment.**

| <b>Social Media Post*</b>                                                                                                         | <b>Patient Organization</b>         | <b>Number of Posts</b> |
|-----------------------------------------------------------------------------------------------------------------------------------|-------------------------------------|------------------------|
| Share your thoughts and feelings about fertility and building a family after cancer.<br>Learn more about this research:<br>[link] | Stupid Cancer                       | 2                      |
|                                                                                                                                   | Lacuna Loft                         | 2                      |
|                                                                                                                                   | Alliance for Fertility Preservation | 1                      |
|                                                                                                                                   | GRYT Health                         | 1                      |

\*Ads included pictures/images and were posted to Facebook, Instagram, and/or on organization webpages.
